# Supplementary material for: A third generation vaccine for human visceral leishmaniasis and post kala azar dermal leishmaniasis: First-in-human trial of ChAd63-KH
Source: PubMed Central journal article supplement (PMC5443534; doi:10.1371/journal.pntd.0005527), 2017-05-12
Supplement: pntd.0005527.s006.pdf [file pntd.0005527.s006.pdf]

**Table S5 HLA typing of study subjects**

| <b>Donor</b> | <b>Group</b> | <b>HLA Class I</b>           | <b>HLA Class II</b>             |
|--------------|--------------|------------------------------|---------------------------------|
| 1            | 1            | A1, A2; B8, B39; Cw7         | DR13, DR17; DQ2, DQ7; DR52      |
| 3            | 1            | A1, A3; B7, B35 ;Cw4, Cw7    | DR1, DR4; DQ5, DQ7; DR53        |
| 4            | 1            | A2, A29; B44, B50; Cw6, Cw16 | DR7, DR15; DQ2, DQ6; DR51, DR53 |
| 6            | 1            | A2; B44, B51; Cw2, Cw5       | DR7, DR15; DQ2, DQ6; DR51, DR53 |
| 10           | 1            | A2, A68; B7, B71; Cw7        | R12, DR15; DQ6, DQ7; DR51, DR52 |
| 11           | 2            | A2, A3; B18, B60 ;Cw7, Cw10  | DR11, DR13; DQ6, DQ7; DR52      |
| 12           | 2            | A1,A3;B8,B18;CW5,CW7         | DR17; DQ2 ;DR52                 |
| 15           | 2            | A3,A24;B7,B27;CW2,CW7        | DR4, DR15; DQ6, DQ8; DR51, DR53 |
| 16           | 2            | A1,A24;B39,B64;CW7,CW6       | DR7, DR13; DQ2, DQ6; DR52, DR53 |
| 17           | 2            | A2;B7,B35;W4,CW7             | DR1, DR15; DQ5, DQ6; DR51       |
| 18           | 2            | A3,A29;B7,B44;CW7,CW16       | DR7, DR15; DQ2, DQ6; DR51, DR53 |
| 19           | 2            | A11,A24;B7,B44,CW5,CW7       | DR4, DR11; DQ7; DR52, DR53      |
| 21           | 2            | A1,A24;B18,B39;CW5,CW7       | DR1, DR17; DQ2, DQ5; DR52       |
| 22           | 2            | A1,A3,B8,B44;CW2,CW7         | DR1, DR17; DQ2, DQ5; DR52       |
| 23           | 2            | A1,A24;B35,B55;CW4,CW9       | DR103, DR13; DQ5, DQ6; DR52     |
| 24           | 2            | A2,A24;B51,B57;CW6,CW7       | DR4, DR7; DQ7, DQ9; DR53        |
| 26           | 2            | A3,A29;B35,B44;CW4,CW16      | DR1, DR7; DQ2, DQ5; DR53        |
| 27           | 2            | A2,A24;B44,B55;CW5,CW9       | DR4, DR13; DQ6, DQ7; DR52, DR53 |
| 28           | 2            | A1,A3;B8,B35;CW7,CW12        | DR4, DR11; DQ7, DQ8; DR52, DR53 |
| 32           | 2            | A3,B7;B65;CW7,CW8            | DR7, DR15; DQ2, DQ6; DR51, DR53 |
