# Supplementary material for: A third generation vaccine for human visceral leishmaniasis and post kala azar dermal leishmaniasis: First-in-human trial of ChAd63-KH
Source: PubMed Central journal article supplement (PMC5443534; doi:10.1371/journal.pntd.0005527), 2017-05-12

Figure S2

A

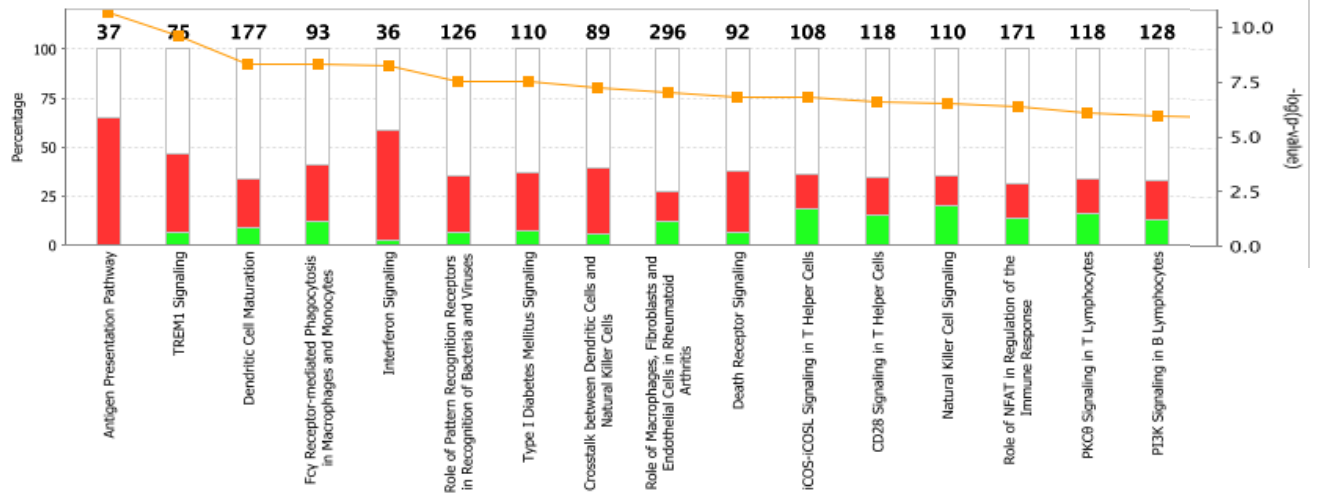

B

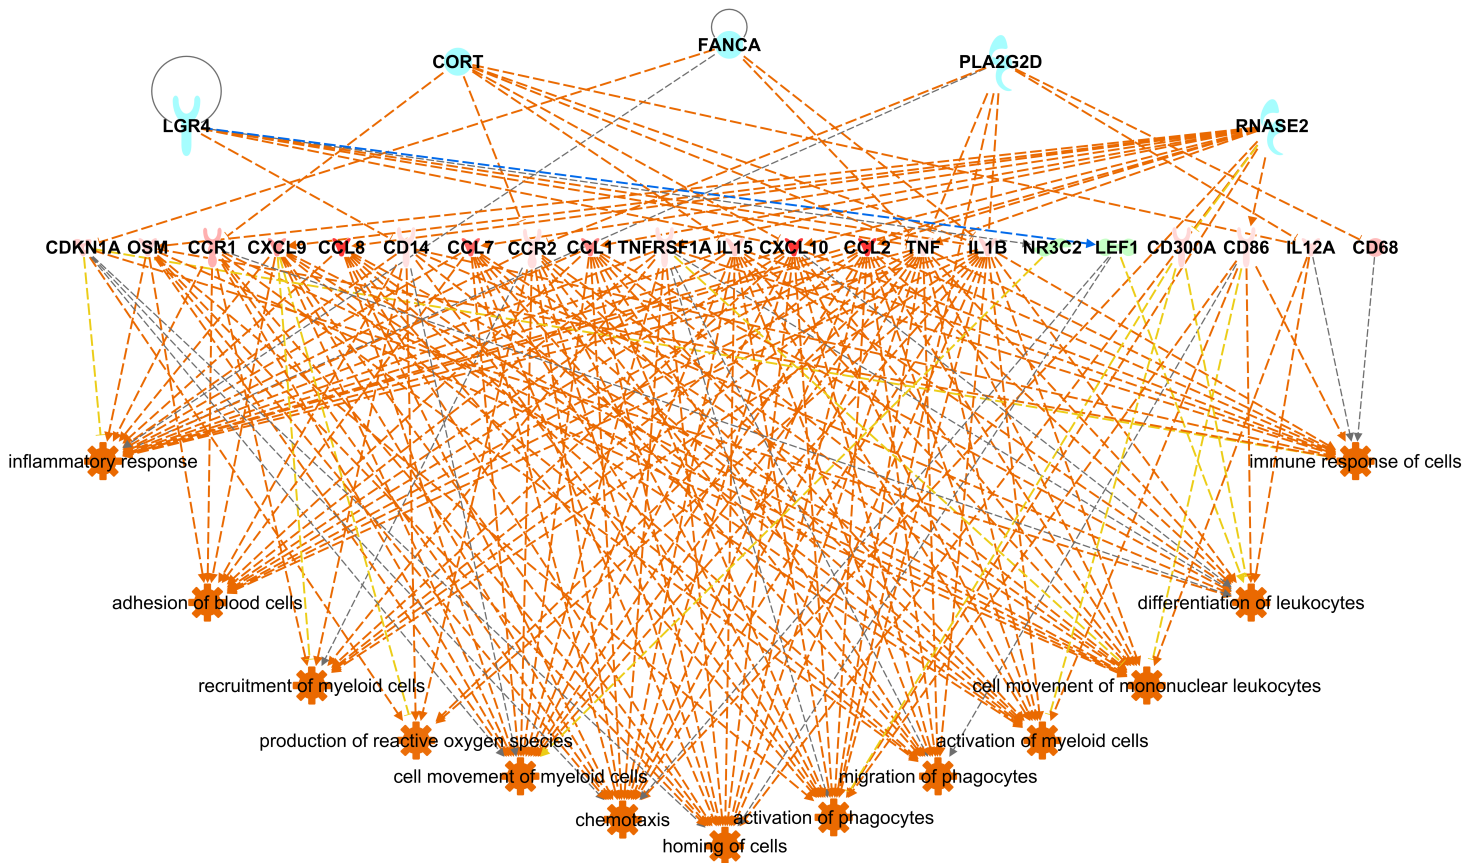

Supplement: pntd.0005527.s008.pdf [file pntd.0005527.s008.pdf]
